# Supplementary material for: A highly selective multi-responsive fluorescence sensor for Zn2+ based on a diarylethene with a 4,6-dimethylpyrimidine unit
Source: Royal Society of Chemistry journal article supplement (doi:10.1039/c9ra10907b), 2020-01-01
Supplement: c9ra10907b1.pdf [file c9ra10907b1.pdf]

## Supporting Information

for

# **A highly selective multi-responsive fluorescence sensor for Zn<sup>2+</sup> based on a diarylethene with a 4,6-dimethylpyrimidine unit**

Xiaoxiao Wu, Zhihui Zhang, Hongliang Liu\* and Shouzhi Pu\*

*Jiangxi Key Laboratory of Organic Chemistry, Jiangxi Science and Technology Normal University, Nanchang  
330013, PR China*

\*Corresponding authors. *E-mail addresses:* [liuhongliang03@163.com](mailto:liuhongliang03@163.com) (H. Liu), [pushouzhi@tsinghua.org.cn](mailto:pushouzhi@tsinghua.org.cn) (S. Pu); Tel.: +86-791-3831996; Fax: +86-791-3831996.

**Figures captions:**

**Fig. S1.**  $^1\text{H}$  NMR spectra (400 MHz) measured in  $\text{DMSO-}d_6$ .

**Fig. S2.**  $^{13}\text{C}$  NMR spectra (100 MHz) measured in  $\text{DMSO-}d_6$ .

**Fig. S3.** Mass spectra of compound **3** in acetonitrile.

**Fig. S4.**  $^1\text{H}$  NMR spectra (400 MHz) measured in  $\text{DMSO-}d_6$ .

**Fig. S5.**  $^{13}\text{C}$  NMR spectra (100 MHz) measured in  $\text{DMSO-}d_6$ .

**Fig. S6.** Mass spectra of diarylethene **10** in acetonitrile.

**Fig. S7.** Changes in the fluorescence and color of **1C** induced by  $\text{Zn}^{2+}/\text{EDTA}$  in acetonitrile ( $2.0 \times 10^{-5} \text{ mol L}^{-1}$ ): (A) **1C** induced by  $\text{Zn}^{2+}/\text{EDTA}$ ; (B) The changes of fluorescence intensity at 518 nm with the addition of different equivalents of  $\text{Zn}^{2+}$ .

**Fig. S8.** Competitive tests for the selectivity of **10** for  $\text{Zn}^{2+}$  in acetonitrile in the presence of other metal ions.

**Fig. S9.** Mass spectra of **10** induced by the stimulation of  $\text{Zn}^{2+}$  in acetonitrile.

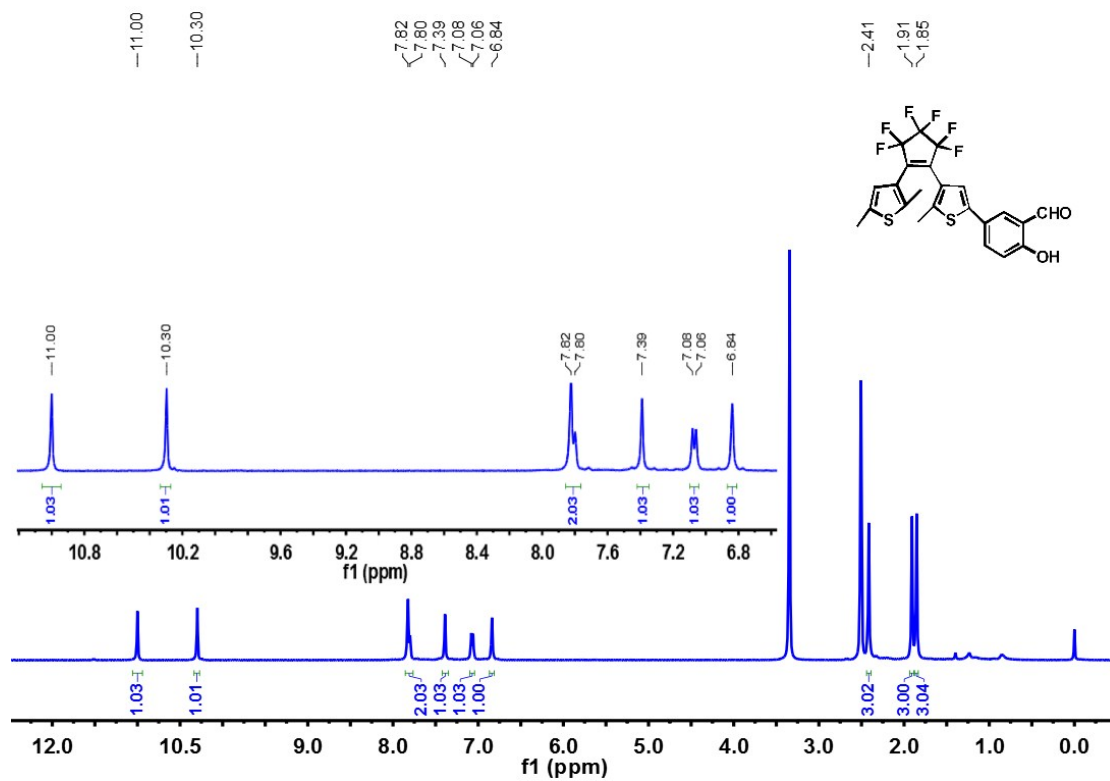

Fig. S1

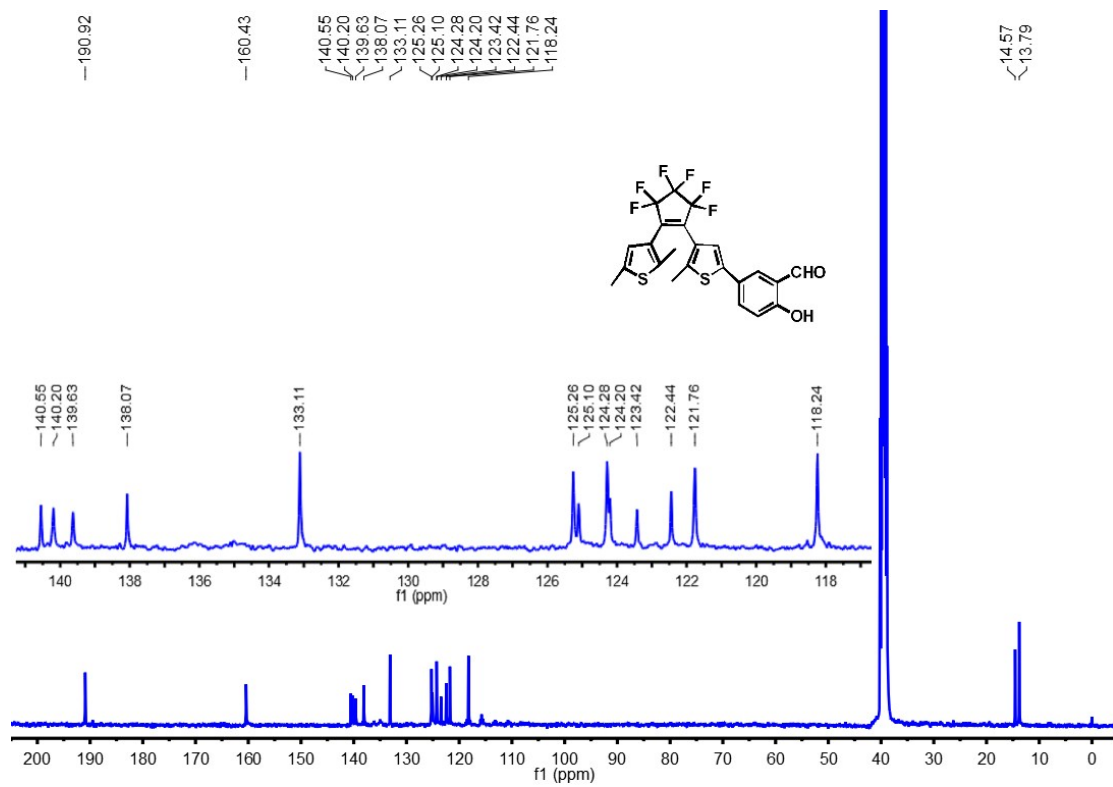

Fig. S2

Spectrum from 20170426-38.wiff (sample 1) - Sample038, +TOF MS (50 - 1600) from 0.093 to 0.302 min

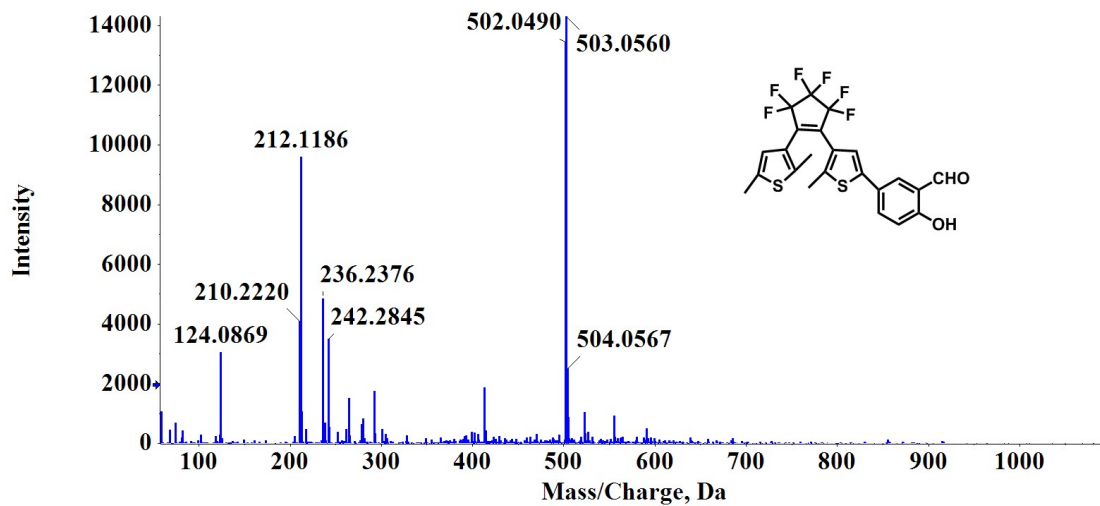

Fig. S3



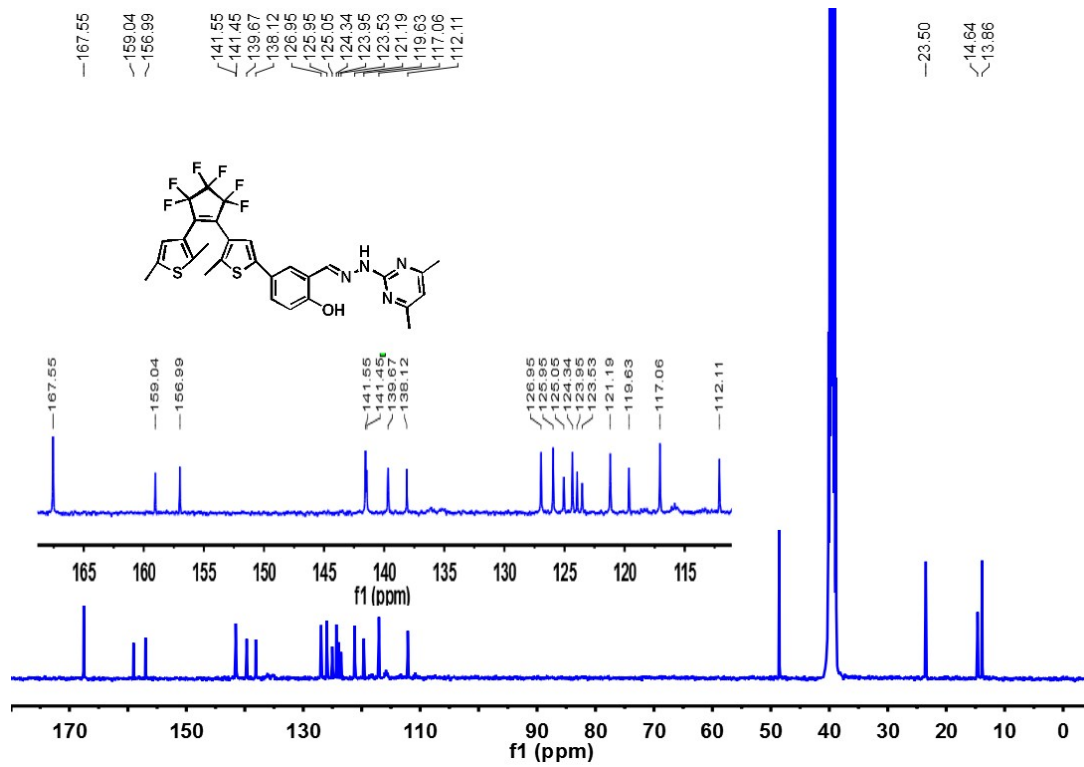

Fig. S5

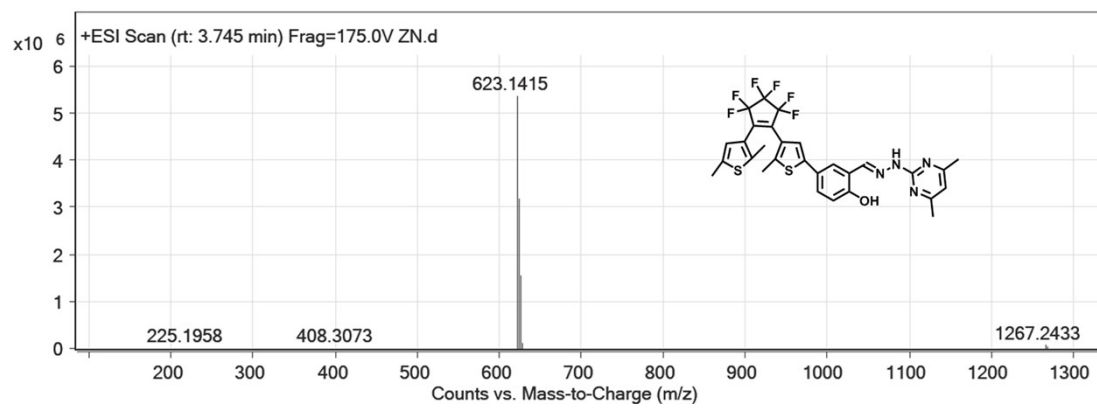

**Fig. S6**



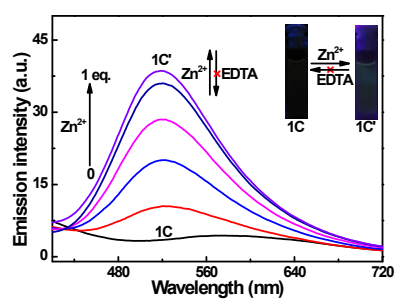

(A)

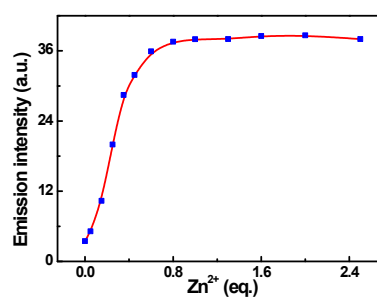

(B)

Fig. S7

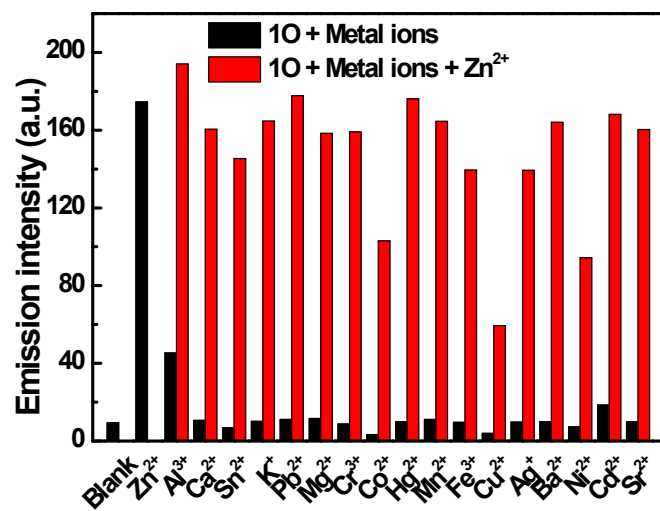

Fig. S8

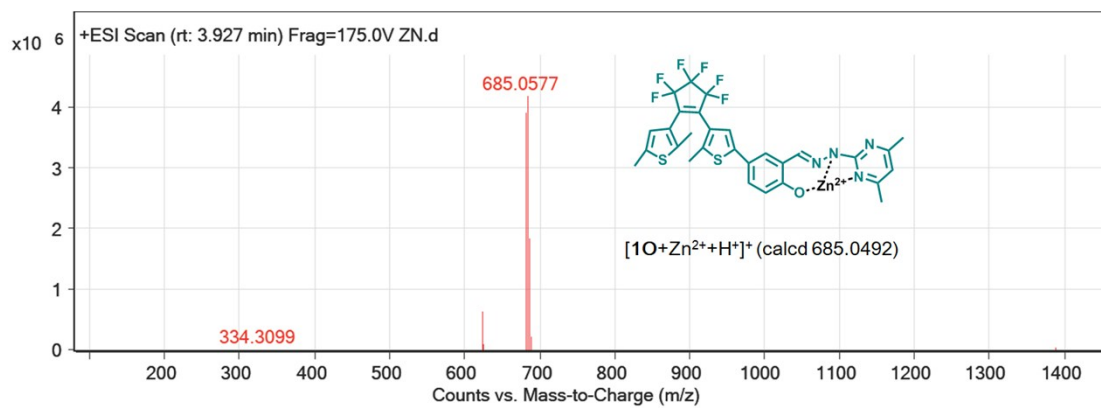

**Fig. S9**
